# Supplementary material for: Modular 3D-printed fluorometer/photometer for determination of iron(ii), caffeine, and ciprofloxacin in pharmaceutical samples
Source: Royal Society of Chemistry journal article supplement (doi:10.1039/d3ra01281f), 2023-01-01
Supplement: d3ra01281f1.pdf [file d3ra01281f1.pdf]

**ELECTRONIC SUPPLEMENTARY MATERIAL**

**Modular 3D-printed fluorometer/photometer for determination of iron(II),  
caffeine, and ciprofloxacin in pharmaceutical samples**

Rafaela Silva Lamarca<sup>a</sup>, João Pedro da Silva<sup>a</sup>, João Paulo Varoni dos Santos<sup>a</sup>, Saïdy

Cristina Ayala-Durán<sup>a</sup>, Paulo Clairmont Feitosa de Lima Gomes<sup>a</sup>

<sup>a</sup> Department of Analytical Chemistry, Physical Chemistry and Inorganic Chemistry,  
National Institute for Alternative Technologies of Detection, Toxicological Evaluation  
and Removal of Micropollutants and Radioactives (INCT-DATREM), Institute of  
Chemistry, São Paulo State University (UNESP), Araraquara, São Paulo, Brazil, 14800-  
060

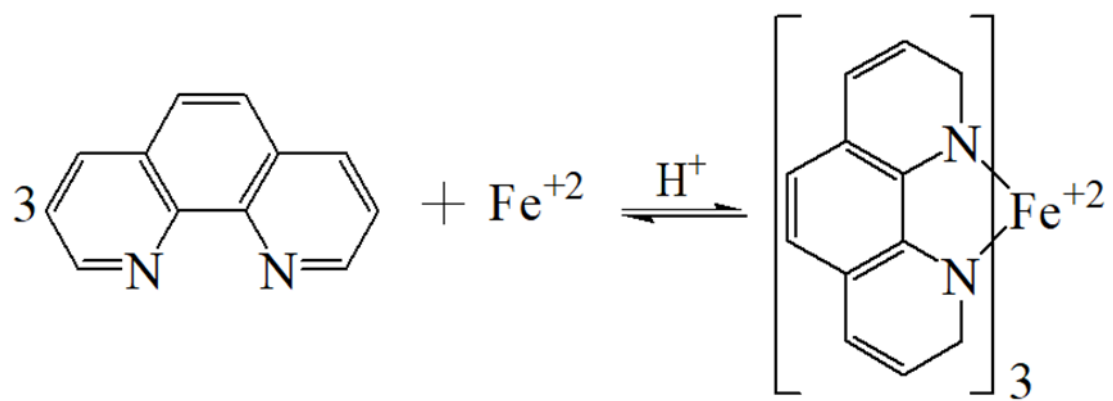

Figure S1 - The proposed reaction mechanism involving Fe(II) and 1,10-phenanthroline<sup>1</sup>.

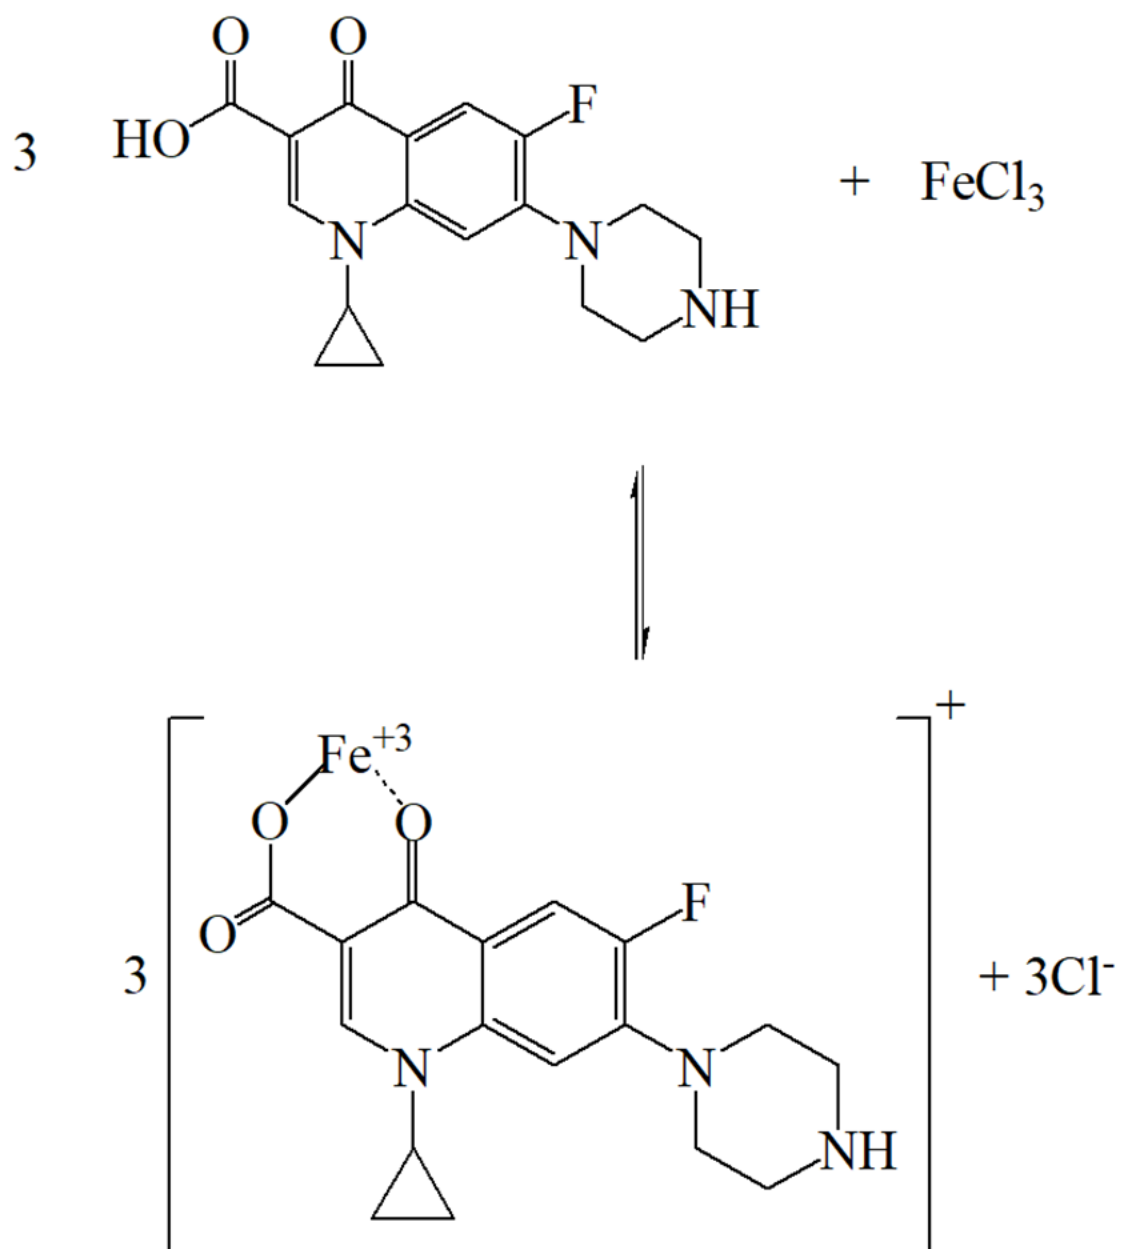

Figure S2 - The proposed reaction mechanism involving CIP and Fe(III) ions<sup>2</sup>.

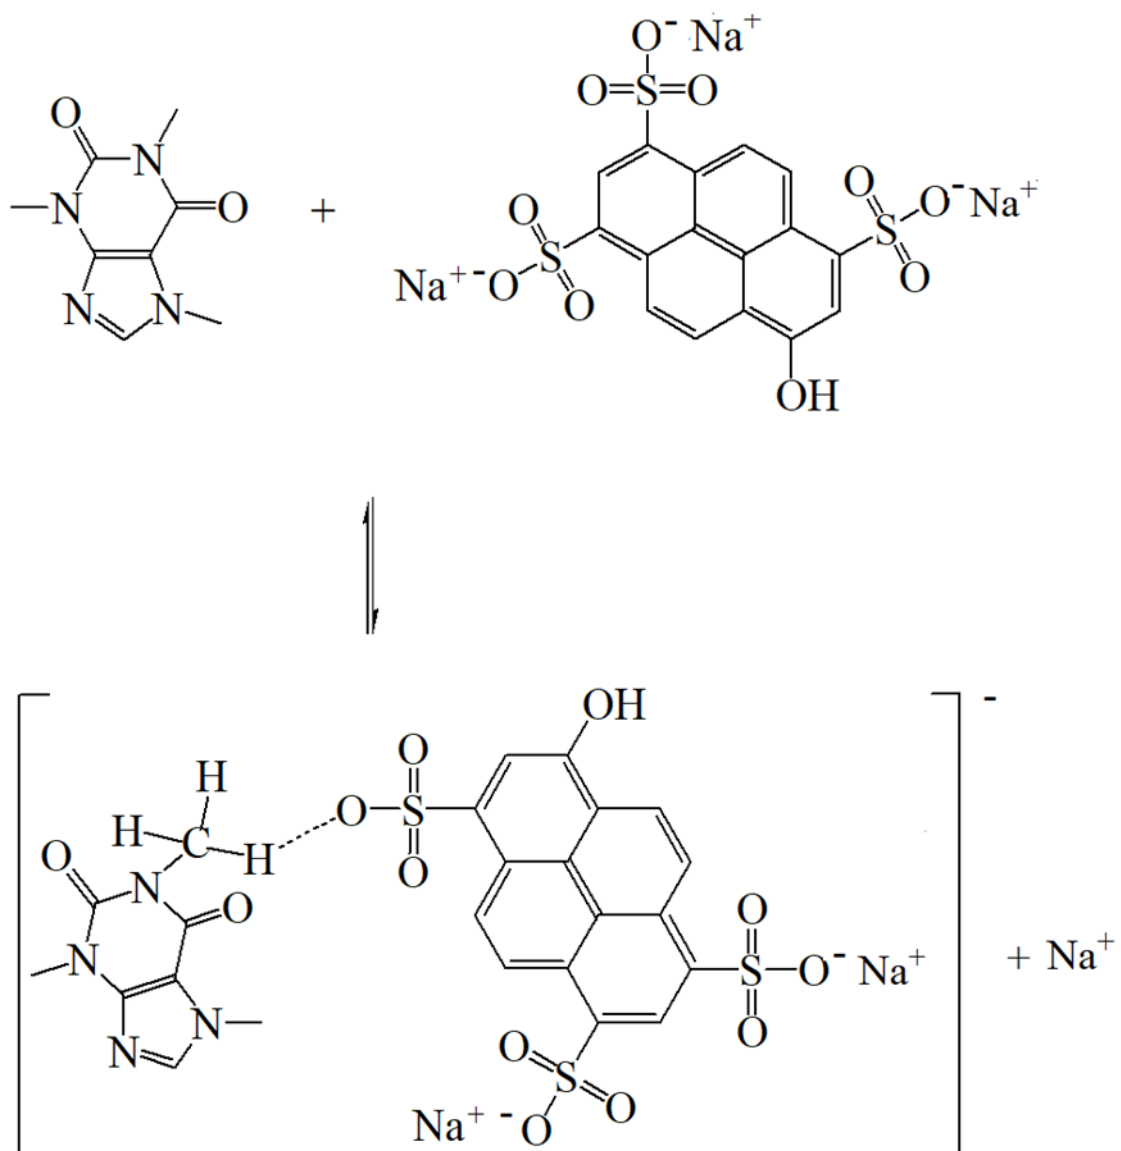

Figure S3 - The proposed reaction mechanism reaction involving caffeine and HPTS<sup>3-</sup>.

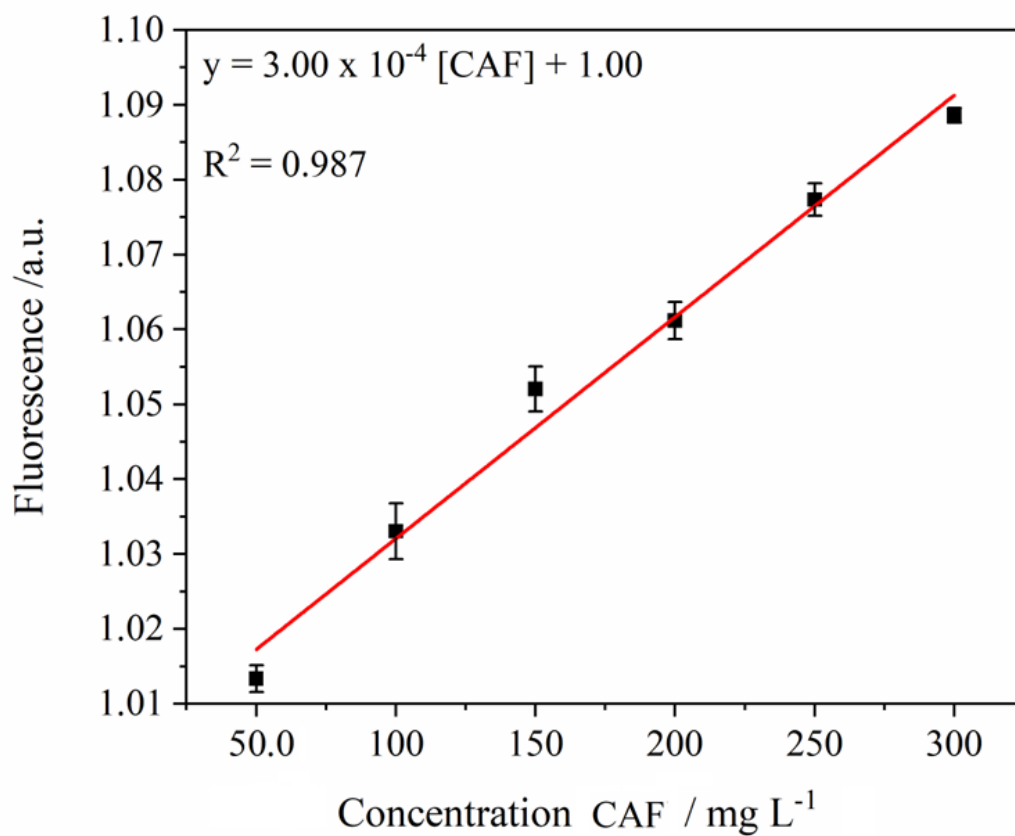

Figure S4 - CAF calibration curve obtained using the modular 3D-printed fluorometer.

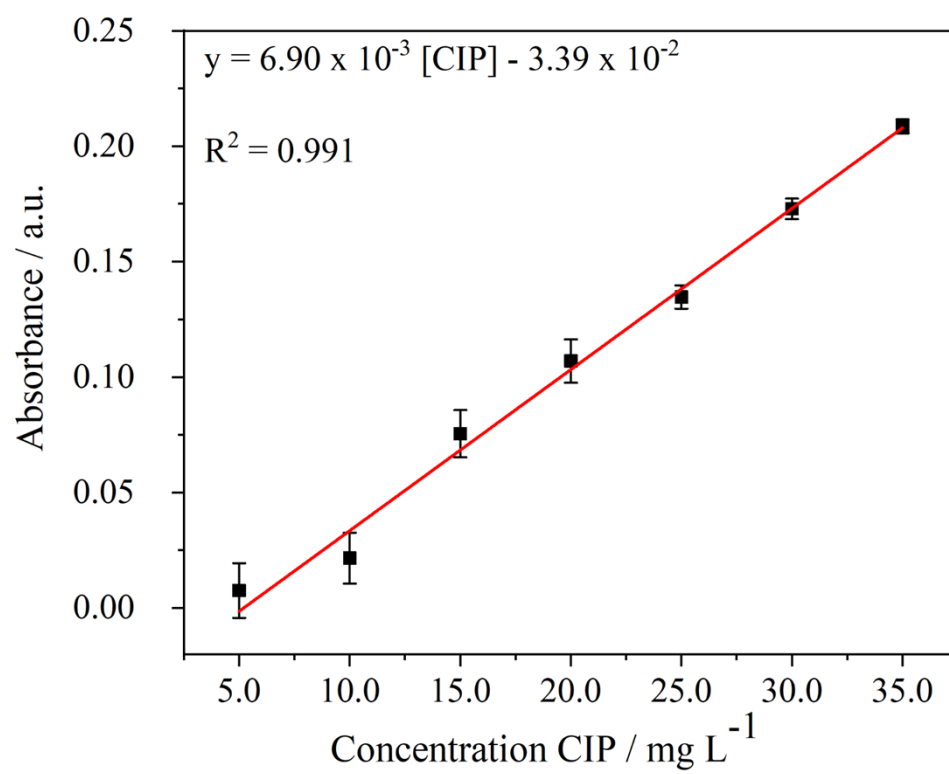

Figure S5 - CIP calibration curve obtained using the modular 3D-printed photometer.

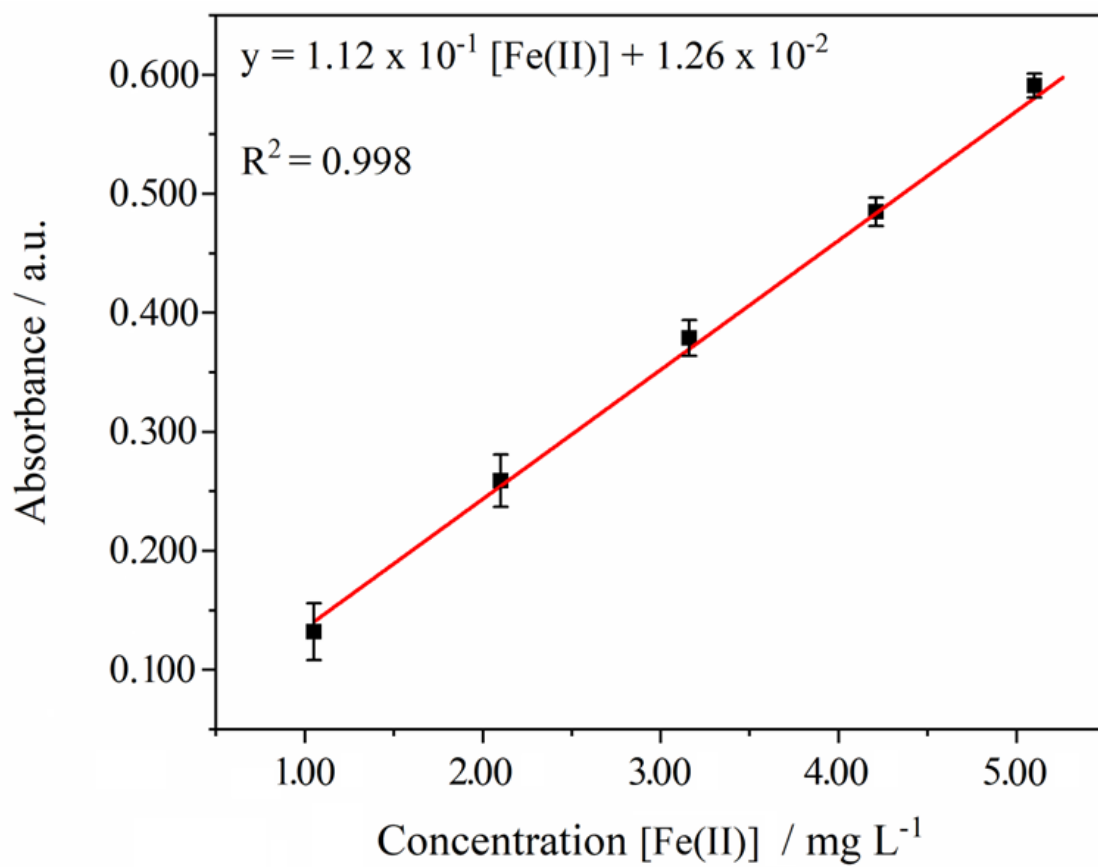

Figure S6 - Fe(II) calibration curve obtained using the modular 3D-printed photometer.

Table S1 - Recovery test performed in the CAF, CIP and Fe(II) tablets.

| Analytes | Labeled concentration / mg L <sup>-1</sup> | Found concentration / mg L <sup>-1</sup> | Recovery | RSD / % | Spike / mg L <sup>-1</sup> | Found after spike / mg L <sup>-1</sup> | Recovery | RSD / % |
|----------|--------------------------------------------|------------------------------------------|----------|---------|----------------------------|----------------------------------------|----------|---------|
| CAF      | 210                                        | 211                                      | 100.5    | 5.50    | 40.0                       | 248                                    | 99.2     | 3.30    |
| CIP      | 15.0                                       | 15.1                                     | 100.7    | 1.80    | 10.0                       | 24.6                                   | 98.4     | 1.30    |
| Fe(II)   | 2.00                                       | 1.99                                     | 99.5     | 4.00    | -                          | -                                      | -        | -       |

- not evaluated.

## References

<sup>1</sup> Sandell, E. B. *Colorimetric Determination of Traces of Metals*, 3<sup>rd</sup> ed.; Interscience, Ed.; New York 1959.

<sup>2</sup> Sultan, S.M.; Suliman, F.E.O. Flow injection spectrophotometric determination of the antibiotic ciprofloxacin in drug formulations. *Analyst* 1992, 117 (9), 1523–1526, <https://doi.org/10.1039/an9921701523>.

<sup>3</sup> Rochat, S.; Steinmann, S. N.; Corminboeuf, C. and, Severin, K. Fluorescence Sensing of Caffeine in Water with Polysulfonated Pyrenes. *Chem. Commun. J.* **2011**, 47 (5), 10584–10586. <https://doi.org/10.1039/c1cc13927d>.
